# Supplementary material for: Eco-friendly chitosan base chlorantraniliprole nano-pesticides for effective control of Chilo suppressalis (Walker) through bidirectional transport
Source: Royal Society of Chemistry journal article supplement (doi:10.1039/d4en00724g), 2024-12-17
Supplement: d4en00724g1.pdf [file d4en00724g1.pdf]

## SUPPORTING INFORMATION

### Eco-friendly Chitosan Base Chlorantraniliprole Nano-pesticides for Effective Control of *Chilo Suppressalis* (Walker) through Bidirectional Transport

Ao Liang<sup>†, 1, 2</sup>, Yunzheng Zhang<sup>†, 1, 2</sup>, Xiang Xu<sup>†, 3</sup>, Hao Wang<sup>1, 2</sup>, Changwei Gong<sup>1, 2</sup>, Jie Hu<sup>1, 2</sup>, Xiangsong Li<sup>1, 2</sup>, Jizhi Yang<sup>1, 2</sup>, Anchun Peng<sup>1, 2</sup>, and Xuegui Wang<sup>1, 2, \*</sup>

<sup>1</sup> College of Agriculture, Sichuan Agricultural University, Chengdu 611130, China

<sup>2</sup> State Key Laboratory of Crop Gene Exploration and Utilization in Southwest China, Sichuan Agricultural University, Chengdu 611130, China

<sup>3</sup> Plant Protection Station, Sichuan Provincial Department of Agriculture and Rural Affairs, Chengdu 610041, China

\* Corresponding author

Xuegui Wang

E-mail: wangxuegui@sicau.edu.cn (X.G. Wang)

**Table S1.** Primers used in qRT-PCR for P450s

|                 | Gene name        | Forward primer        | Reverse primer        |
|-----------------|------------------|-----------------------|-----------------------|
| P450 genes      | <i>CYP324A12</i> | CGATGTGGATGCGTGAGATG  | CTGTTCCCTGAAGGCGTCGAA |
|                 | <i>CYP321F3</i>  | TTACGTGGTGCAGGGATCAA  | AGTGGGGTCATCTTTGCCT   |
|                 | <i>CYP9A68</i>   | GCATCGTTGGCGCTTTTCTT  | TCCGAGAAGTGTTTCGATCCG |
|                 | <i>CYP6CV5</i>   | ACACCAGTGTTTACGACACGA | ATTTGGCGGTCAATGCTCTT  |
| reference genes | <i>EF1</i>       | CTGGGTATTGGACAAACTGA  | GAGGTTCCCTGTGATCATGTT |

Note: The above twelve gene primers were designed using NCBI Primer-BLAST.

<sup>†</sup> This author has an equal contribution and first authorship.

\* Corresponding author at: College of Agriculture, Sichuan Agricultural University, Chengdu 611130, China  
E-mail address: wangxuegui@sicau.edu.cn (X.G. Wang).

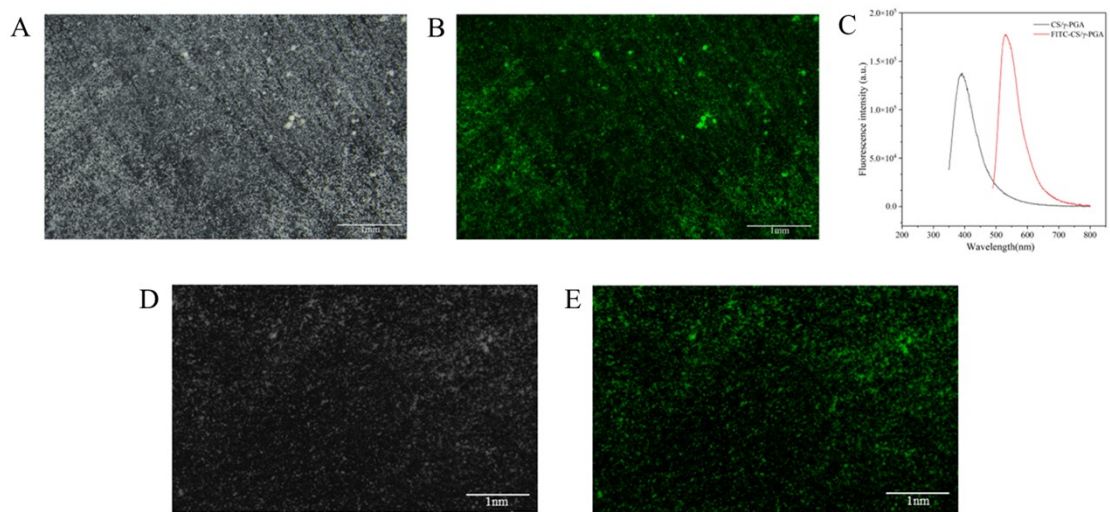

**Fig. S1.** FITC-CS/ $\gamma$ -PGA and FITC-CLAP@CS/ $\gamma$ -PGA under body fluorescence microscope (a) open field of FITC-CS/ $\gamma$ -PGA. (b) excitation field of FITC-CS/ $\gamma$ -PGA. (c) Emission spectra of CS/ $\gamma$ -PGA and FITC-CS/ $\gamma$ -PGA under 480 nm excitation wavelengths. (d) open field of FITC-CLAP@CS/ $\gamma$ -PGA. (e) excitation field of FITC-CLAP@CS/ $\gamma$ -PGA.

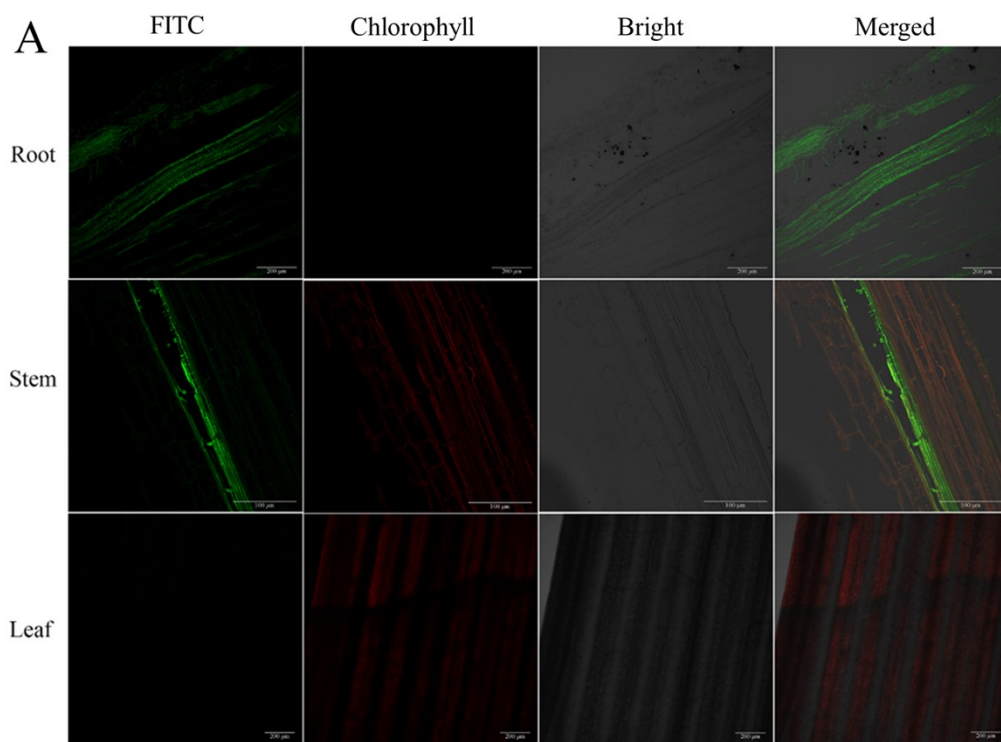

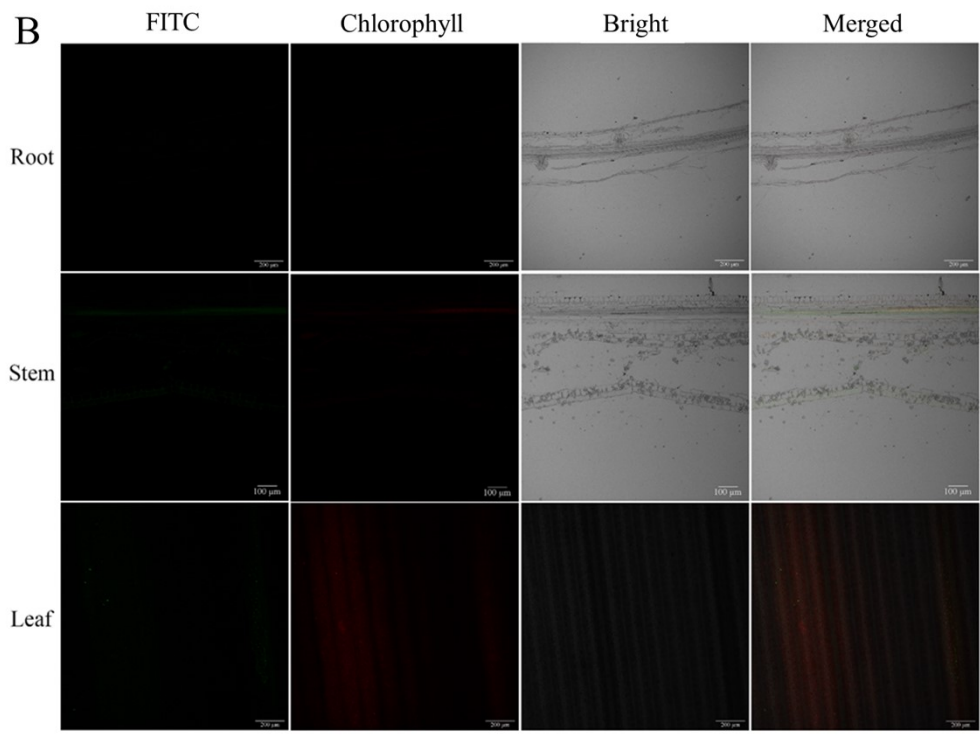

**Fig. S2.** (A) Distribution of FITC-CS/ $\gamma$ -PGA in different parts of rice at 72 hours after root treatment. (B) Distribution of FITC-CS/ $\gamma$ -PGA in different parts of rice at 72 hours after leaf treatment.

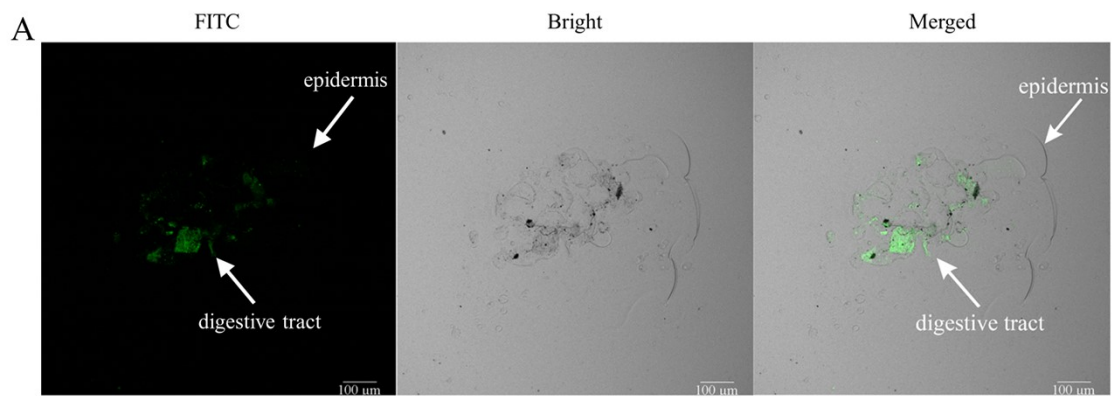

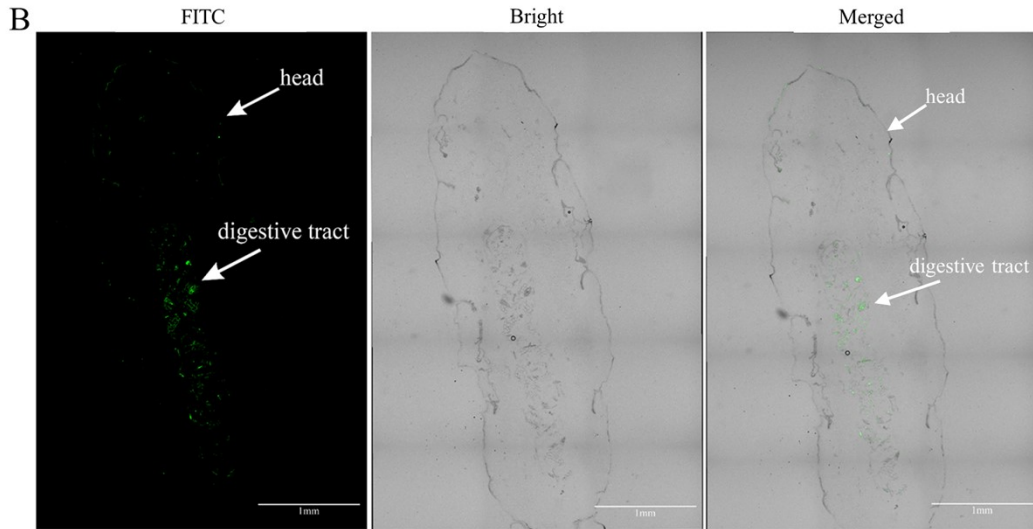

**Fig. S3.** (A) Distribution of FITC-CS/ $\gamma$ -PGA in larva (take stem) at 24 hours after feed (Cross section). (B) Distribution of FITC-CS/ $\gamma$ -PGA in the larva (take stem) at 24 hours after feed (Longitudinal section).

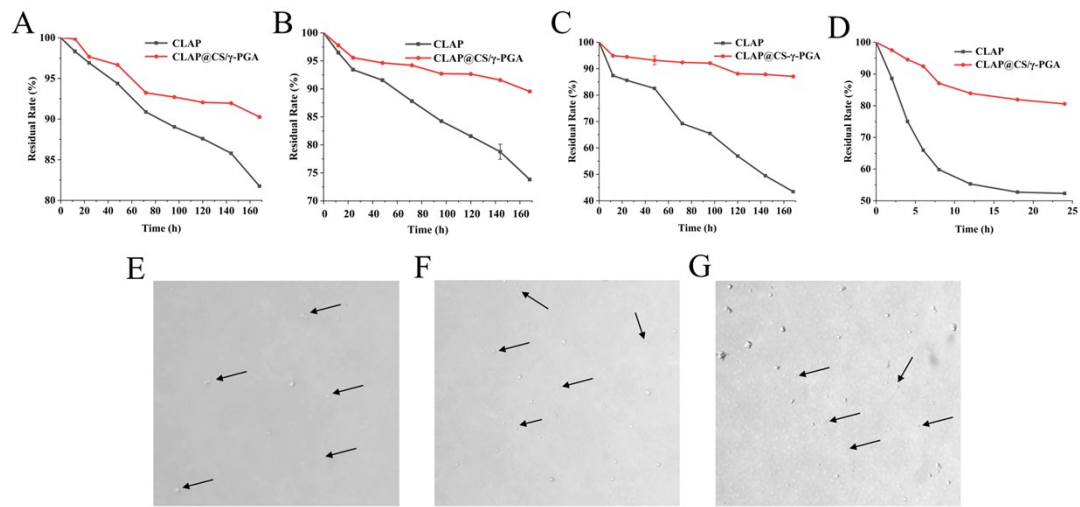

**Fig. S4.** (A) The residual amounts of CLAP in deionized water at 4 °C for both CLAP and CLAP@CS/ $\gamma$ -PGA. (B) The residual amounts of CLAP in deionized water at 25 °C for both CLAP and CLAP@CS/ $\gamma$ -PGA. (C) The residual amounts of CLAP in deionized water at 54 °C for both CLAP and CLAP@CS/ $\gamma$ -PGA. (D) The residual amounts of CLAP in deionized water under UV irradiation for both CLAP and CLAP@CS/ $\gamma$ -PGA. (E) Dispersion of CLAP@CS/ $\gamma$ -PGA in deionized water. (F) Dispersion of CLAP@CS/ $\gamma$ -PGA in methanol. (G) Dispersion of CLAP@CS/ $\gamma$ -PGA in ethanol.

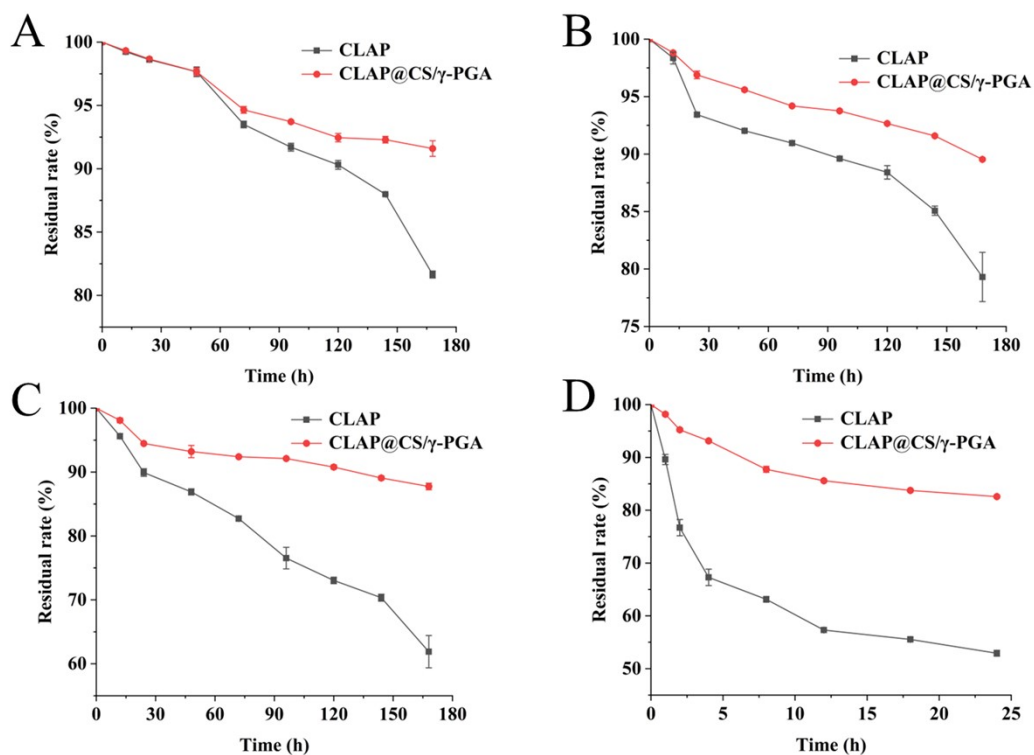

**Fig. S5.** (A) The residual amounts of CLAP in dechlorinated drinking water at 4 °C for both CLAP and CLAP@CS/γ-PGA. (B) The residual amounts of CLAP in dechlorinated drinking water at 25 °C for both CLAP and CLAP@CS/γ-PGA. (C) The residual amounts of CLAP in dechlorinated drinking water at 4 °C for both CLAP and CLAP@CS/γ-PGA. (D) The residual amounts of CLAP in dechlorinated drinking water under UV irradiation for both CLAP and CLAP@CS/γ-PGA.

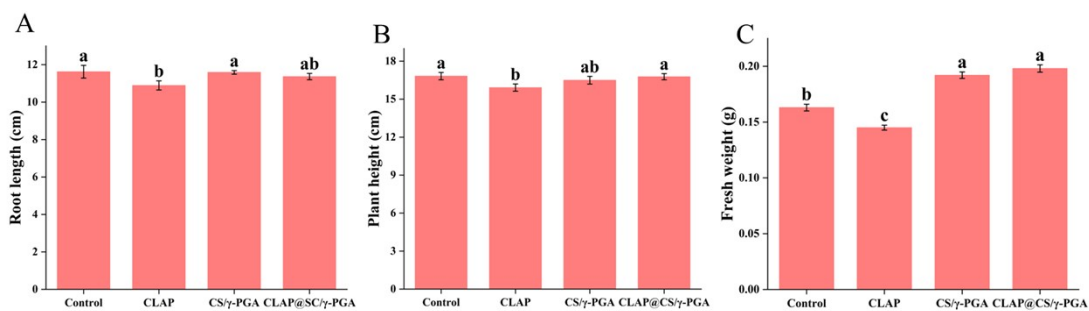

**Fig. S6.** (A) Root length of rice plants 7 days after treatment. (B) Plant height of rice plants 7 days after treatment. (C) Fresh weight of rice plants 7 days after treatment.
